# Supplementary material for: Effects of sarcosine and N, N-dimethylglycine on NMDA receptor-mediated excitatory field potentials
Source: PubMed Central journal article supplement (PMC5331637; doi:10.1186/s12929-016-0314-8), 2017-02-28
Supplement: 12929_2016_314_MOESM1_ESM.pdf [file 12929_2016_314_MOESM1_ESM.pdf]

# Supplement

## Fig. 1

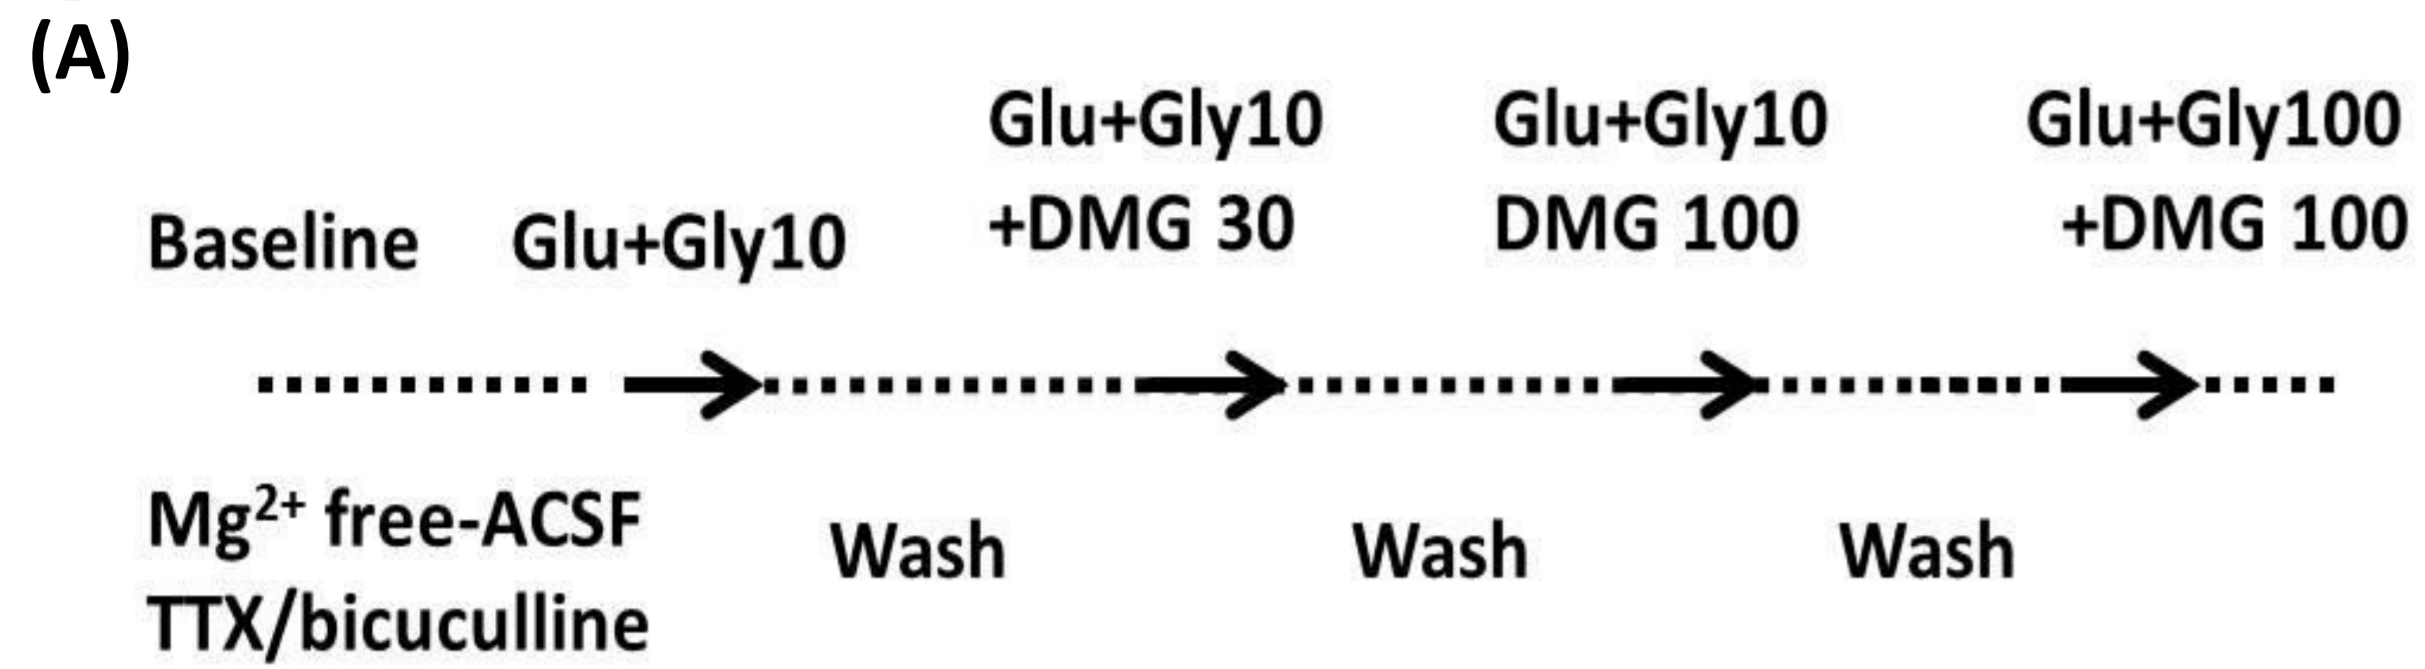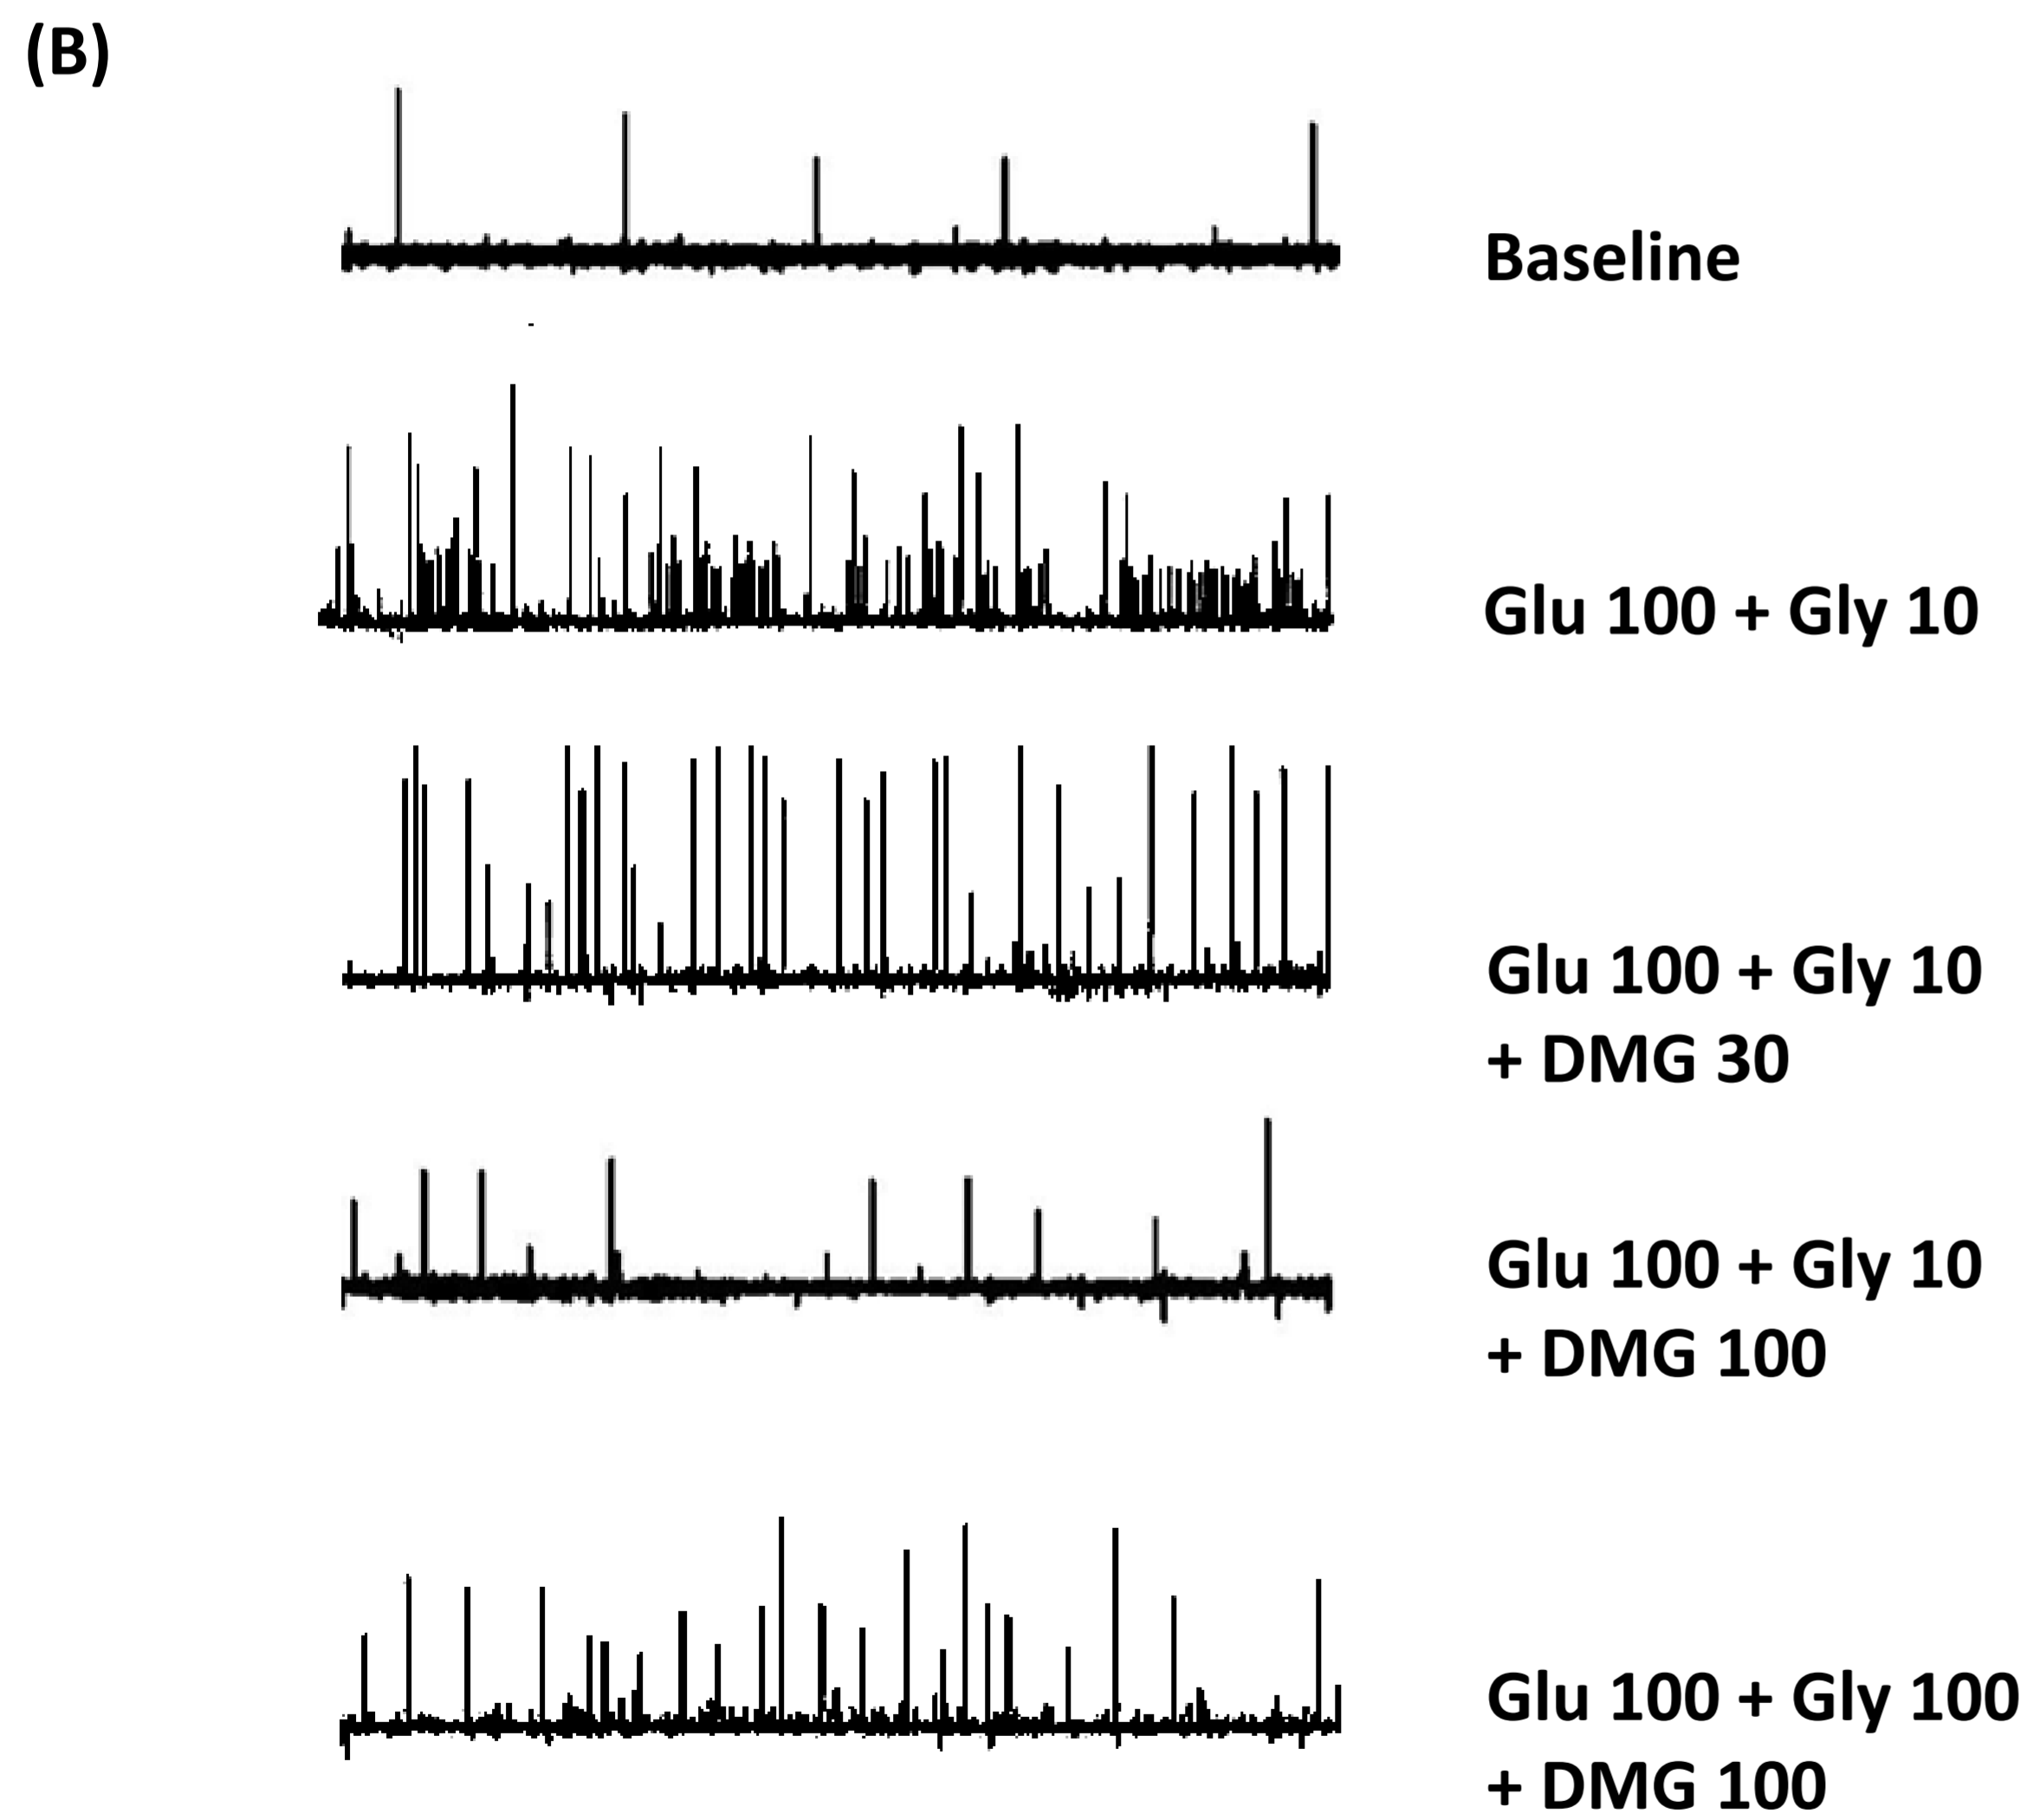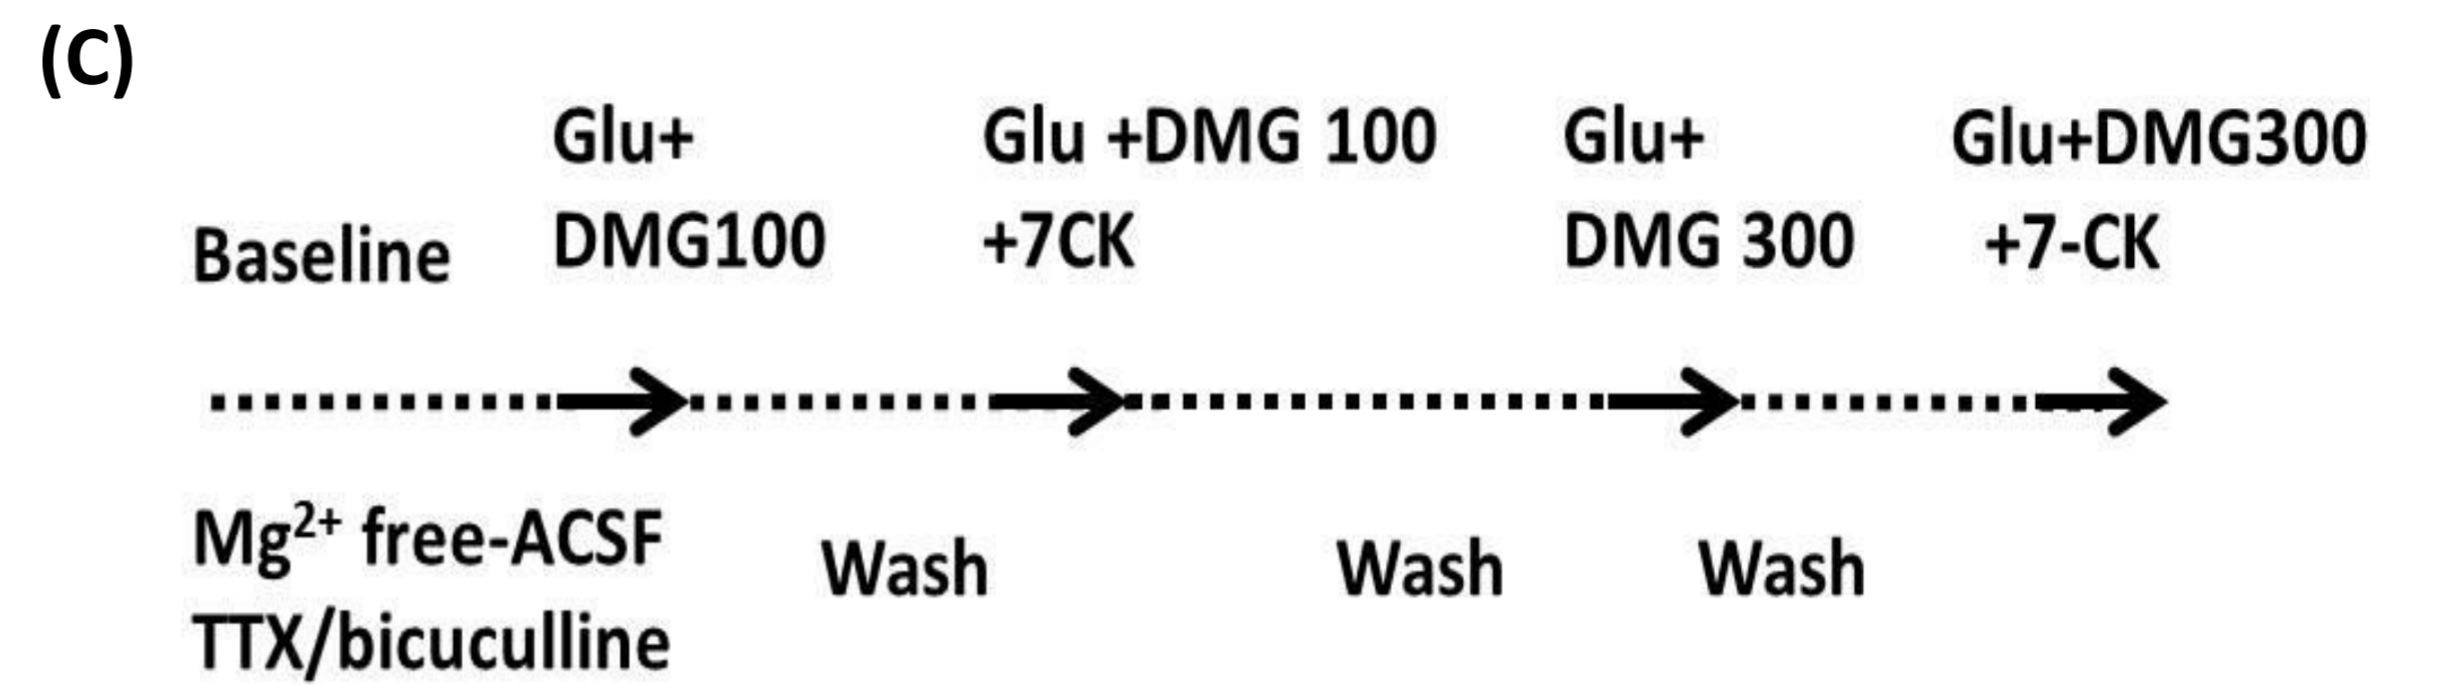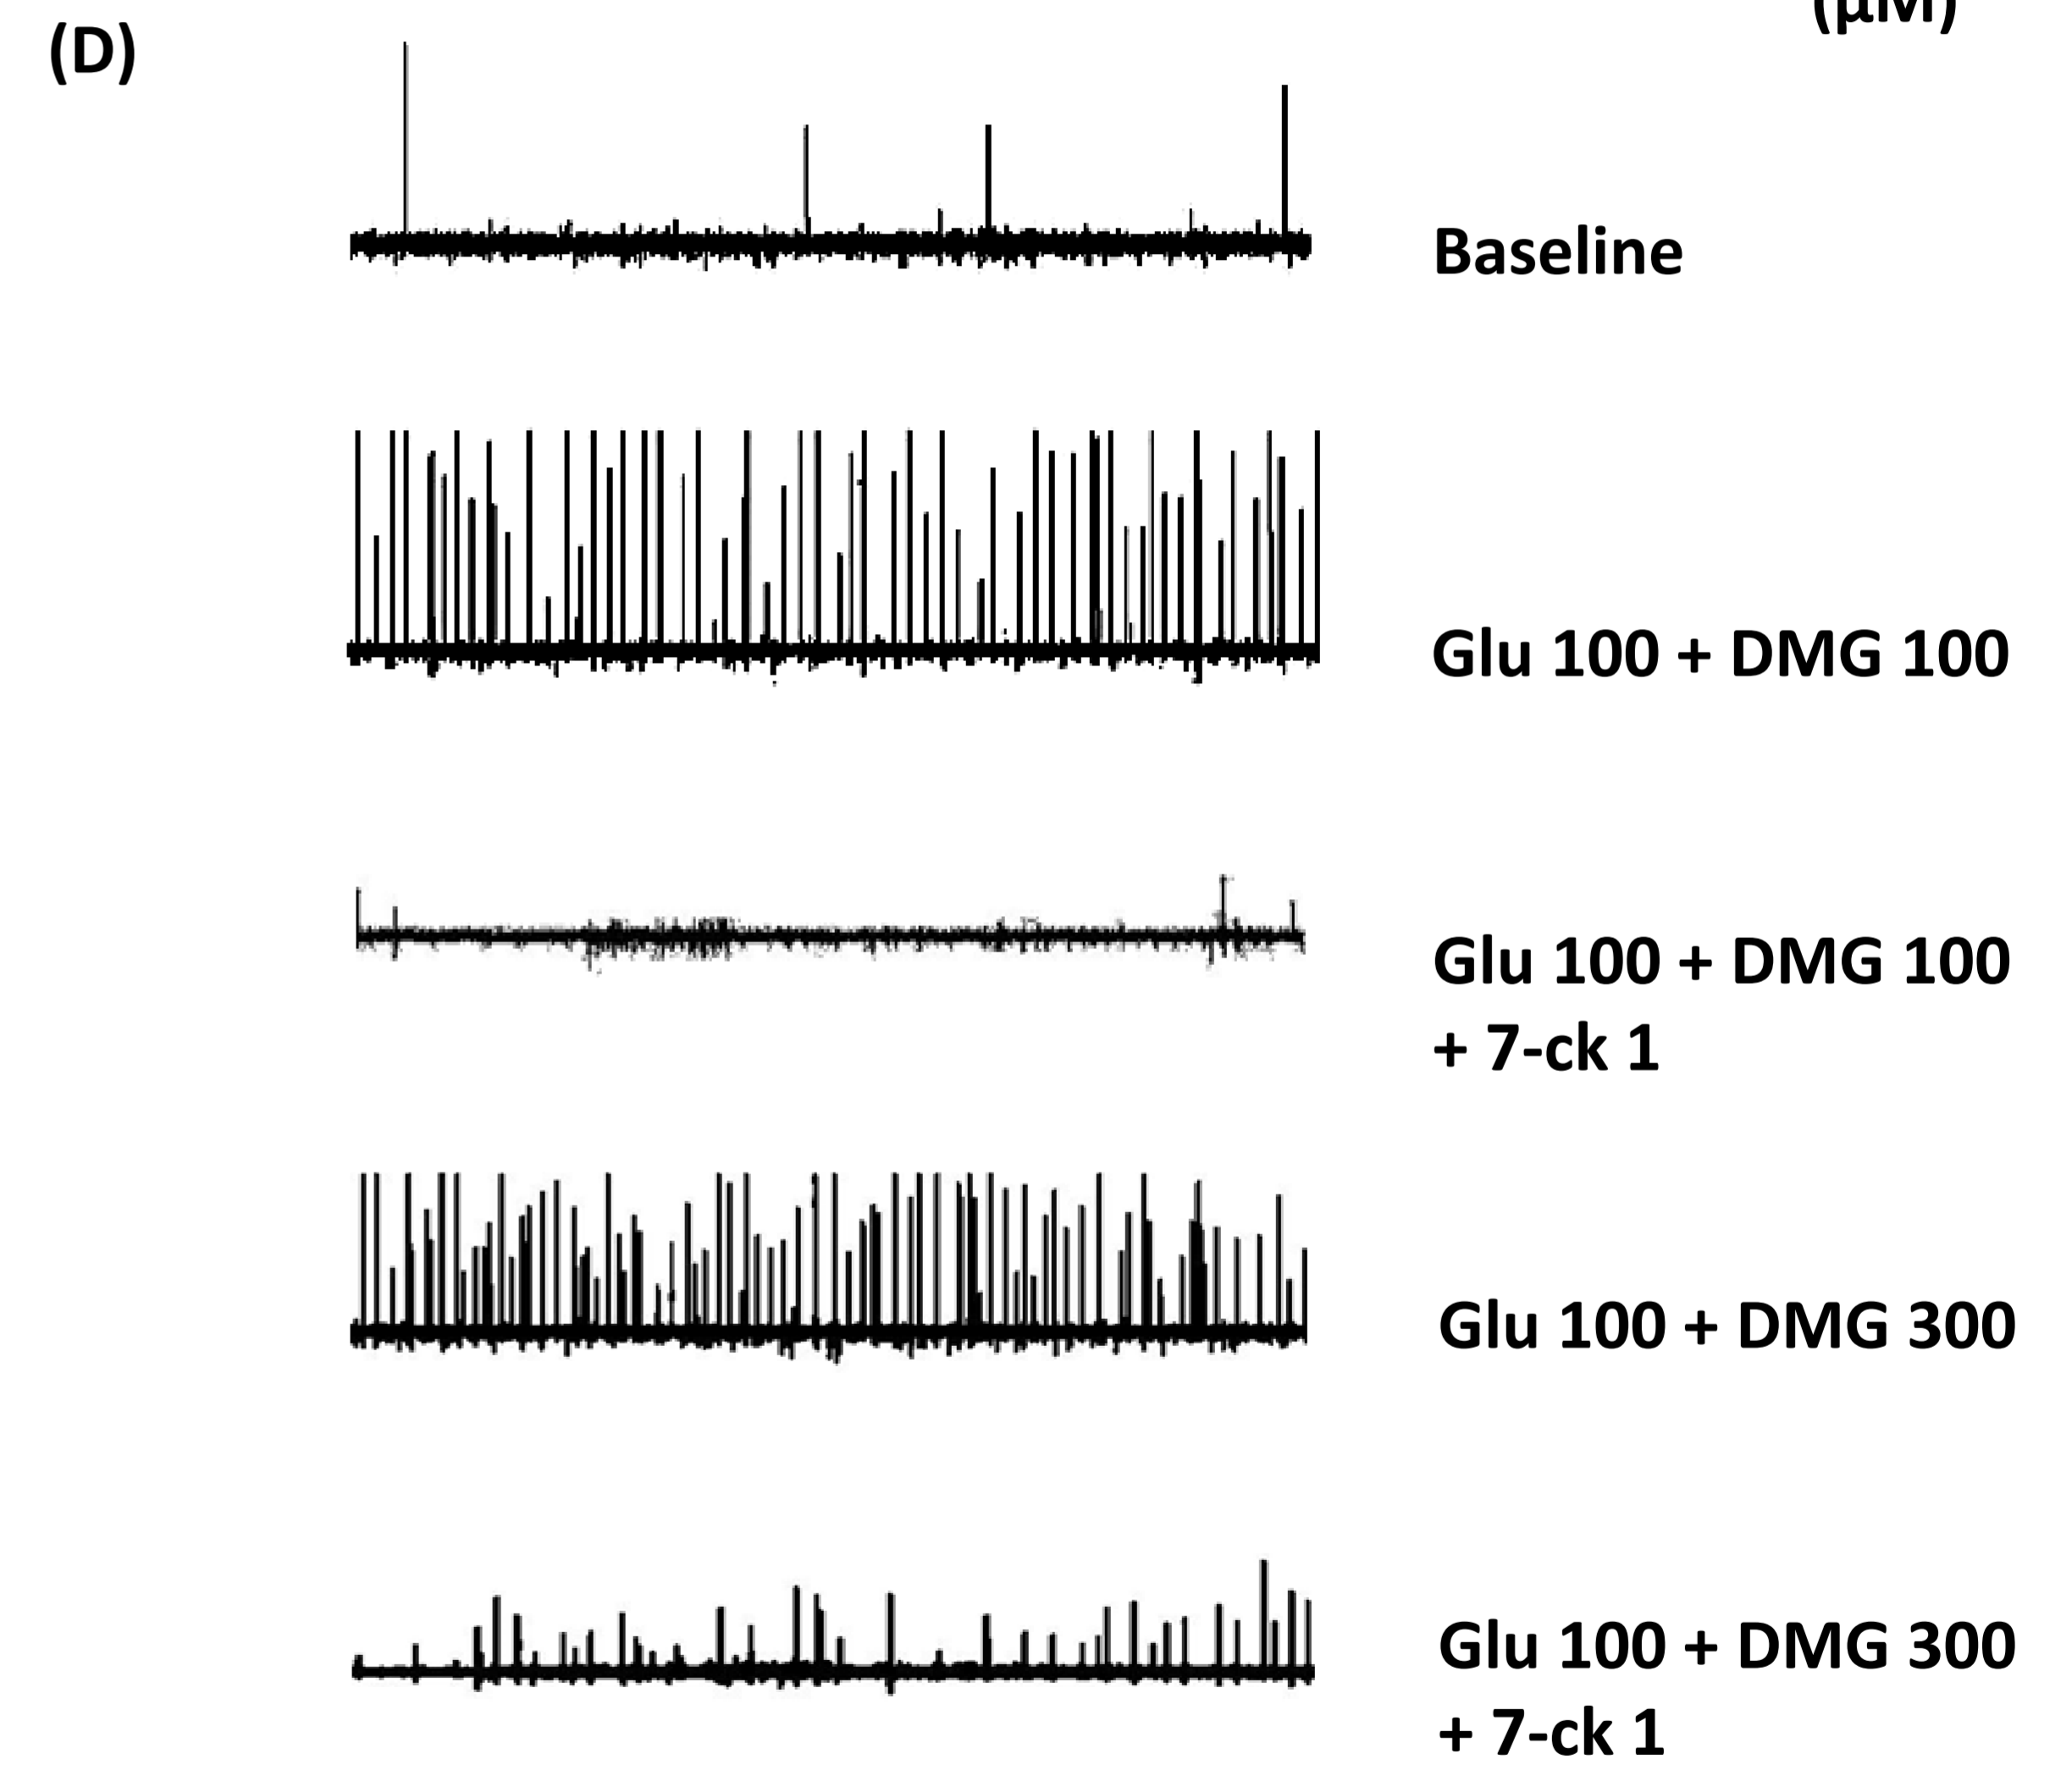

0.5 mV  
5 S
